# Supplementary material
Source: publisher site journal article supplement (https://www.dovepress.com/article/540975)

**A**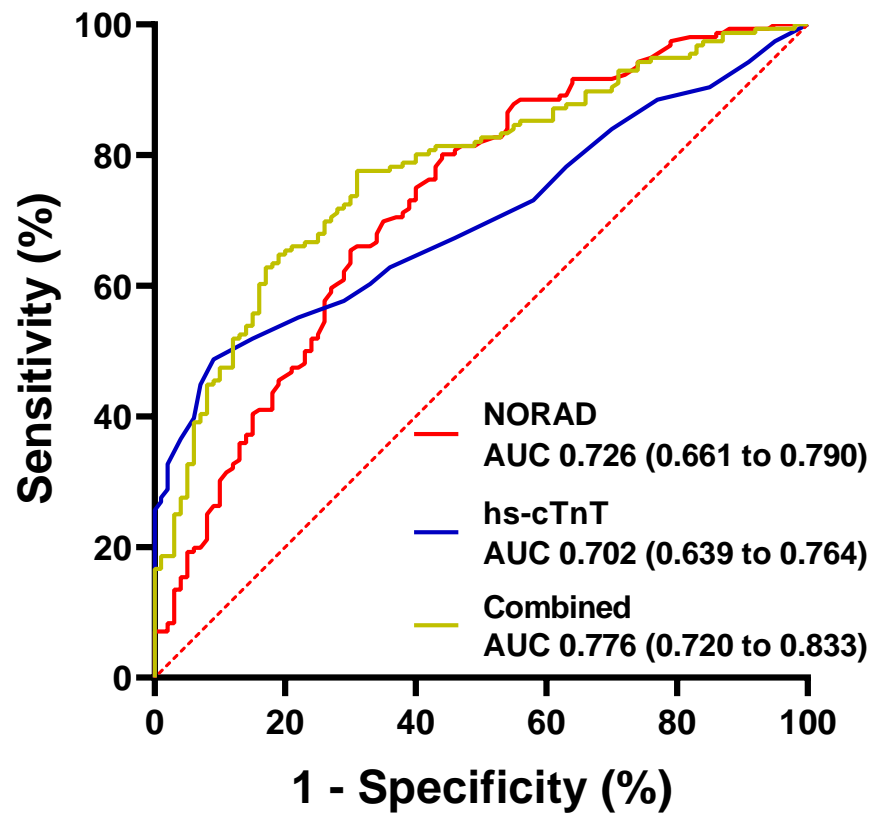**B**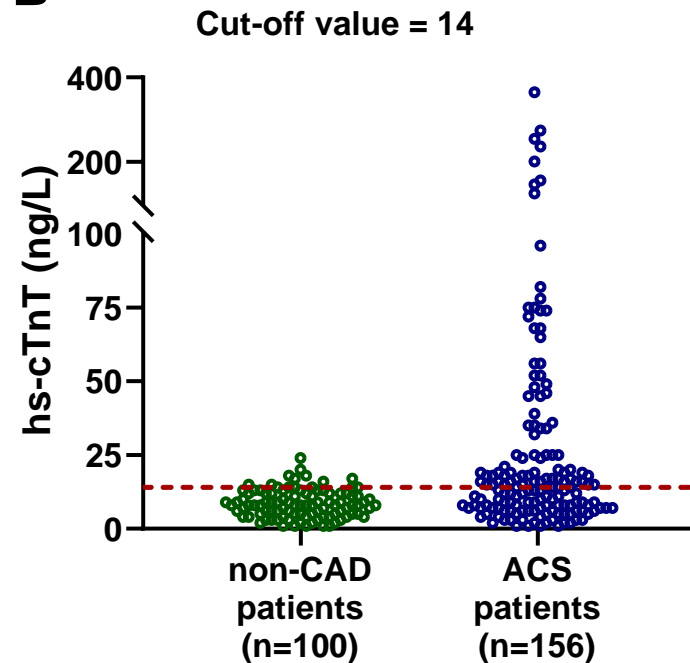

| Sens (%) | Spec (%) | PPV (%) | NPV (%) |
|----------|----------|---------|---------|
| 48.7     | 91.0     | 89.4    | 53.2    |

Supplement: Supplementary file 1 [file Figure S1.pdf › Figure S1.pdf]

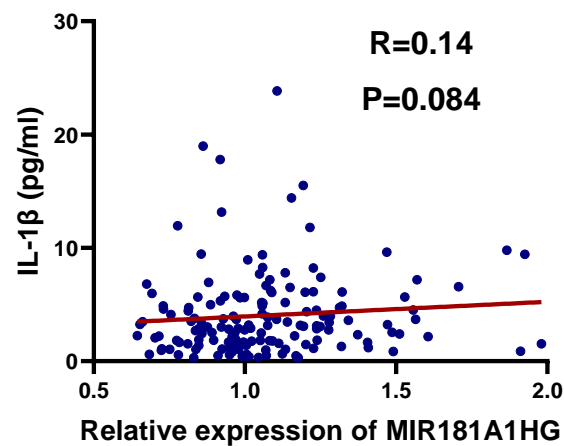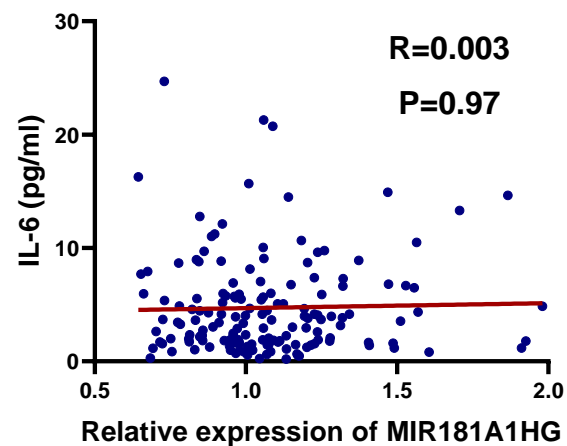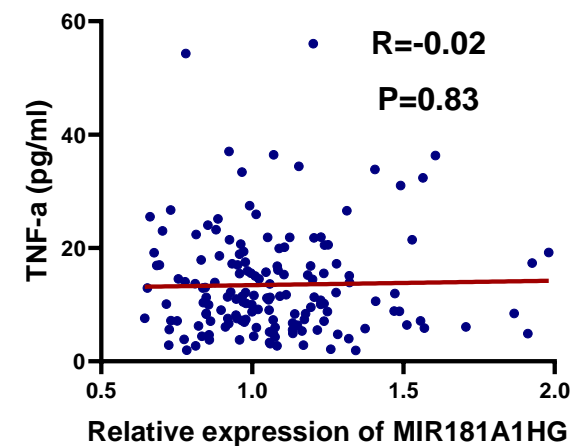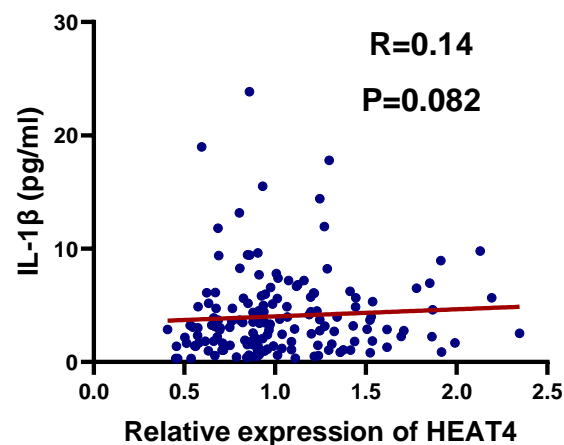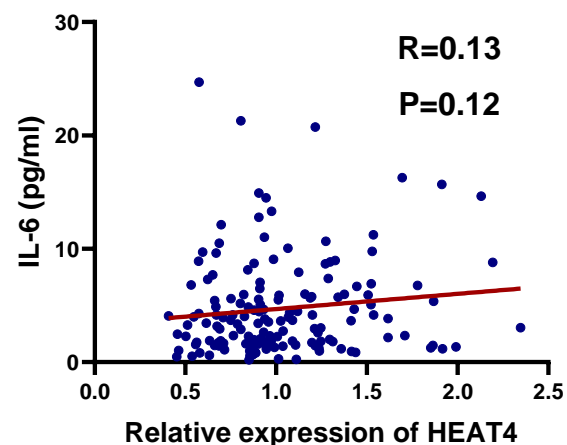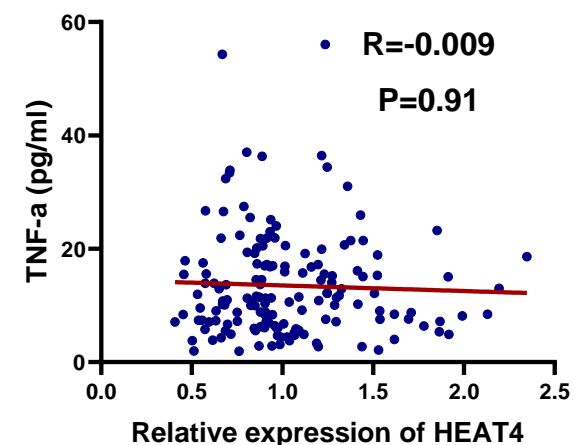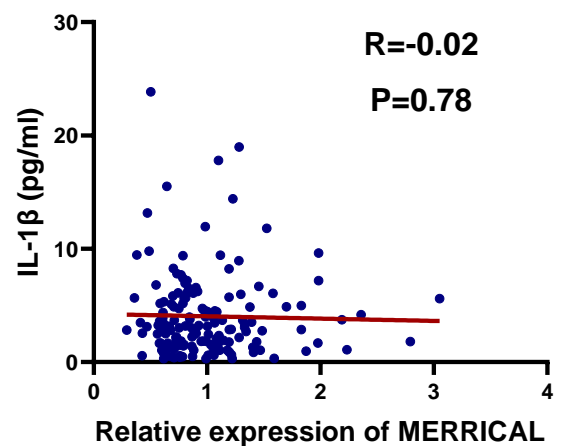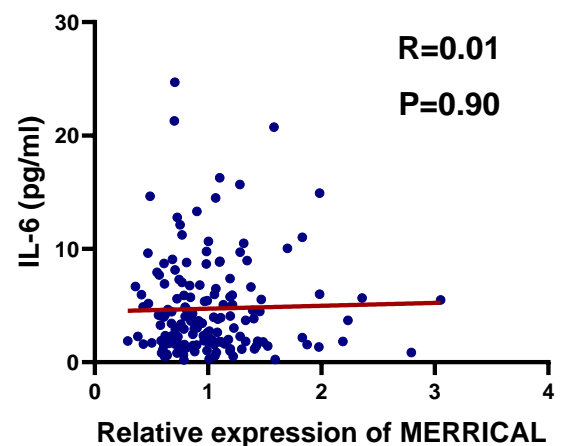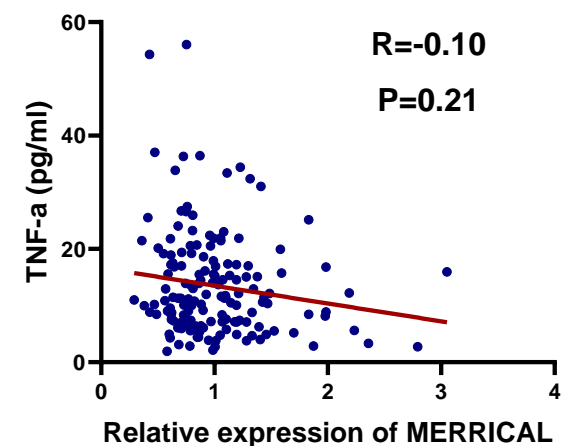

Supplement: Supplementary file 2 [file Figure S2.pdf › Figure S2.pdf]
